# Supplementary material for: Improvement of an antibody-enzyme coupling yield by enzyme surface supercharging
Source: PubMed Central journal article supplement (PMC4203919; doi:10.1186/s12896-014-0088-6), 2014-10-18

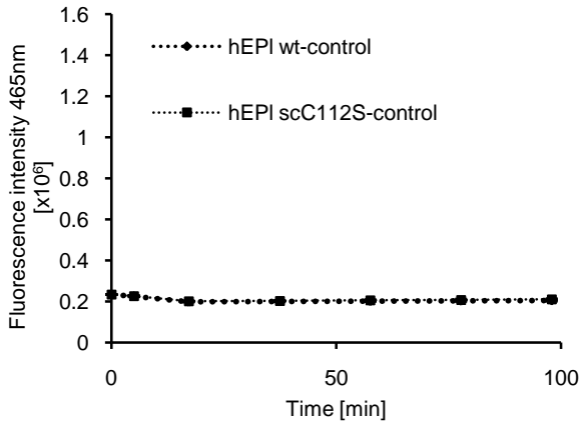

Supplement: 12896_2014_88_MOESM2_ESM.pdf [file 12896_2014_88_MOESM2_ESM.pdf]
